# Supplementary material for: Kaempferia parviflora Rhizome Extract as Potential Anti-Acne Ingredient
Source: MDPI journal article supplement (doi:10.3390/molecules27144401), 2022-07-08
Supplement: s1 [file s1]

# *Kaempferia parviflora* Rhizome Extract as Potential Anti-Acne Ingredient

Pawee Sitthichai<sup>1</sup>, Setinee Chanpirom<sup>1,2</sup>, Tharakorn Maneerat<sup>3,4,5</sup>, Rawiwan Charoensup<sup>5,6</sup>, Thapakorn Tree-Udom<sup>1,2</sup>, Punyawatt Pintathong<sup>1</sup>, Surat Laphookhieo<sup>3,4</sup> and Tawanun Sripisut<sup>1,2\*</sup>

<sup>1</sup> School of Cosmetic Science, Mae Fah Luang University, Chiang Rai 57100, Thailand; pawee2534@gmail.com (P.S.); setinee.cha@mfu.ac.th (S.C.); thapakorn.tre@mfu.ac.th (T.T.); punyawatt.pin@mfu.ac.th (P.P.)

<sup>2</sup> Phytocosmetics and Cosmeceuticals Research Group, Mae Fah Luang University, Chiang Rai 57100, Thailand

<sup>3</sup> School of Science, Mae Fah Luang University, Chiang Rai 57100, Thailand; wisanu.man@mfu.ac.th (T.M.); surat.lap@mfu.ac.th (S.L.)

<sup>4</sup> Center of Chemical Innovation for Sustainability (CIS), Mae Fah Luang University, Chiang Rai 57100, Thailand

<sup>5</sup> Medicinal Plants Innovation Center of Mae Fah Luang University, Mae Fah Luang University, Chiang Rai 57100, Thailand; rawiwan.cha@mfu.ac.th (R.C.)

<sup>6</sup> School of Integrative Medicine, Mae Fah Luang University, Chiang Rai 57100, Thailand

\* Correspondence: tawanun.sri@mfu.ac.th; Tel.: +66-53-916-833

**Table S1.** Chemical profile of flavonoids in *K. parviflora* methanol extract.

| Methanol extract |                      |          |                                                |                                         |
|------------------|----------------------|----------|------------------------------------------------|-----------------------------------------|
| Peak number      | Retention time (min) | Mass (g) | Chemical formula                               | Name of compounds                       |
| 1                | 16.45                | 312.0998 | C <sub>18</sub> H <sub>16</sub> O <sub>5</sub> | 5,7,4' -Trimethoxyflavone               |
| 2                | 17.08                | 312.0998 | C <sub>18</sub> H <sub>16</sub> O <sub>5</sub> | 3,5,7-Trimethoxyflavone                 |
| 3                | 17.70                | 298.0841 | C <sub>17</sub> H <sub>14</sub> O <sub>5</sub> | 5-Hydroxy-7,4'-dimethoxyflavone         |
| 4                | 18.45                | 282.0892 | C <sub>17</sub> H <sub>14</sub> O <sub>4</sub> | 5,7-Dimethoxyflavone                    |
| 5                | 19.40                | 342.1103 | C <sub>19</sub> H <sub>18</sub> O <sub>6</sub> | 3,5,7,4'-Tetramethoxyflavone            |
| 6                | 19.81                | 342.1104 | C <sub>19</sub> H <sub>18</sub> O <sub>7</sub> | 5-Hydroxy-3,7,3',4'-tetramethoxyflavone |
| 7                | 19.94                | 268.0736 | C <sub>16</sub> H <sub>12</sub> O <sub>4</sub> | 5-Hydroxy-7-methoxyflavone              |
| 8                | 20.14                | 298.0841 | C <sub>17</sub> H <sub>14</sub> O <sub>5</sub> | 5-Hydroxy-3,7-dimethoxyflavone          |
| 9                | 20.74                | 328.0947 | C <sub>18</sub> H <sub>16</sub> O <sub>6</sub> | 5-Hydroxy-3,7,4'-trimethoxyflavone      |

**Table S2.** Chemical profile of flavonoids in *K. parviflora* ethanol extract.

| Ethanol extract |                      |          |                                                |                                 |
|-----------------|----------------------|----------|------------------------------------------------|---------------------------------|
| Peak number     | Retention time (min) | Mass (g) | Chemical formula                               | Name of compounds               |
| 1               | 16.35                | 312.0998 | C <sub>18</sub> H <sub>16</sub> O <sub>5</sub> | 5,7,4' -Trimethoxyflavone       |
| 2               | 17.08                | 312.0998 | C <sub>18</sub> H <sub>16</sub> O <sub>5</sub> | 3,5,7-Trimethoxyflavone         |
| 3               | 17.73                | 298.0841 | C <sub>17</sub> H <sub>14</sub> O <sub>5</sub> | 5-Hydroxy-7,4'-dimethoxyflavone |

|   |       |          |                                                |                                         |
|---|-------|----------|------------------------------------------------|-----------------------------------------|
| 4 | 18.45 | 282.0892 | C <sub>17</sub> H <sub>14</sub> O <sub>4</sub> | 5,7-Dimethoxyflavone                    |
| 5 | 18.99 | 342.1103 | C <sub>19</sub> H <sub>18</sub> O <sub>6</sub> | 3,5,7,4'-Tetramethoxyflavone            |
| 6 | 19.85 | 358.1052 | C <sub>19</sub> H <sub>18</sub> O <sub>7</sub> | 5-Hydroxy-3,7,3',4'-tetramethoxyflavone |
| 7 | 19.94 | 268.0735 | C <sub>16</sub> H <sub>12</sub> O <sub>4</sub> | 5-Hydroxy-7-methoxyflavone              |
| 8 | 20.15 | 298.0841 | C <sub>17</sub> H <sub>14</sub> O <sub>5</sub> | 5-Hydroxy-3,7-dimethoxyflavone          |
| 9 | 20.77 | 328.0946 | C <sub>18</sub> H <sub>16</sub> O <sub>6</sub> | 5-Hydroxy-3,7,4'-trimethoxyflavone      |

**Table S3.** Chemical profile of flavonoids in *K. parviflora* acetone extract.

| Acetone extract |                      |          |                                                |                                         |
|-----------------|----------------------|----------|------------------------------------------------|-----------------------------------------|
| Peak number     | Retention time (min) | Mass (g) | Chemical formula                               | Name of compounds                       |
| 1               | 16.35                | 312.0998 | C <sub>18</sub> H <sub>16</sub> O <sub>5</sub> | 5,7,4' -Trimethoxyflavone               |
| 2               | 17.04                | 312.0998 | C <sub>18</sub> H <sub>16</sub> O <sub>5</sub> | 3,5,7-Trimethoxyflavone                 |
| 3               | 17.69                | 298.0841 | C <sub>17</sub> H <sub>14</sub> O <sub>5</sub> | 5-Hydroxy-7,4'-dimethoxyflavone         |
| 4               | 18.46                | 282.0892 | C <sub>17</sub> H <sub>14</sub> O <sub>4</sub> | 5,7-Dimethoxyflavone                    |
| 5               | 19.14                | 342.1103 | C <sub>19</sub> H <sub>18</sub> O <sub>6</sub> | 3,5,7,4'-Tetramethoxyflavone            |
| 6               | 19.81                | 358.1052 | C <sub>19</sub> H <sub>18</sub> O <sub>7</sub> | 5-Hydroxy-3,7,3',4'-tetramethoxyflavone |
| 7               | 19.94                | 268.0735 | C <sub>16</sub> H <sub>12</sub> O <sub>4</sub> | 5-Hydroxy-7-methoxyflavone              |
| 8               | 20.14                | 298.0841 | C <sub>17</sub> H <sub>14</sub> O <sub>5</sub> | 5-Hydroxy-3,7-dimethoxyflavone          |
| 9               | 20.77                | 328.0946 | C <sub>18</sub> H <sub>16</sub> O <sub>6</sub> | 5-Hydroxy-3,7,4'-trimethoxyflavone      |

**Table S4.** Chemical profile of flavonoids in *K. parviflora* ethyl acetate extract.

| Ethyl acetate extract |                      |          |                                                |                                         |
|-----------------------|----------------------|----------|------------------------------------------------|-----------------------------------------|
| Peak number           | Retention time (min) | Mass (g) | Chemical formula                               | Name of compounds                       |
| 1                     | 16.35                | 312.0997 | C <sub>18</sub> H <sub>16</sub> O <sub>5</sub> | 5,7,4' -Trimethoxyflavone               |
| 2                     | 17.08                | 312.0997 | C <sub>18</sub> H <sub>16</sub> O <sub>5</sub> | 3,5,7-Trimethoxyflavone                 |
| 4                     | 18.45                | 282.0892 | C <sub>17</sub> H <sub>14</sub> O <sub>4</sub> | 5,7-Dimethoxyflavone                    |
| 5                     | 18.99                | 342.1104 | C <sub>19</sub> H <sub>18</sub> O <sub>6</sub> | 3,5,7,4'-Tetramethoxyflavone            |
| 6                     | 19.85                | 358.1053 | C <sub>19</sub> H <sub>18</sub> O <sub>7</sub> | 5-Hydroxy-3,7,3',4'-tetramethoxyflavone |
| 7                     | 19.94                | 268.0735 | C <sub>16</sub> H <sub>12</sub> O <sub>4</sub> | 5-Hydroxy-7-methoxyflavone              |
| 8                     | 20.15                | 298.0841 | C <sub>17</sub> H <sub>14</sub> O <sub>5</sub> | 5-Hydroxy-3,7-dimethoxyflavone          |
| 9                     | 20.77                | 328.0946 | C <sub>18</sub> H <sub>16</sub> O <sub>6</sub> | 5-Hydroxy-3,7,4'-trimethoxyflavone      |

**Table S5.** Chemical profile of flavonoids in *K. parviflora* dichloromethane extract.

| Dichloromethane extract |                      |          |                                                |                                         |
|-------------------------|----------------------|----------|------------------------------------------------|-----------------------------------------|
| Peak number             | Retention time (min) | Mass (g) | Chemical formula                               | Name of compounds                       |
| 1                       | 16.35                | 312.0997 | C <sub>18</sub> H <sub>16</sub> O <sub>5</sub> | 5,7,4' -Trimethoxyflavone               |
| 2                       | 17.08                | 312.0997 | C <sub>18</sub> H <sub>16</sub> O <sub>5</sub> | 3,5,7-Trimethoxyflavone                 |
| 4                       | 18.45                | 282.0892 | C <sub>17</sub> H <sub>14</sub> O <sub>4</sub> | 5,7-Dimethoxyflavone                    |
| 5                       | 18.99                | 342.1103 | C <sub>19</sub> H <sub>18</sub> O <sub>6</sub> | 3,5,7,4'-Tetramethoxyflavone            |
| 6                       | 19.85                | 358.1052 | C <sub>19</sub> H <sub>18</sub> O <sub>7</sub> | 5-Hydroxy-3,7,3',4'-tetramethoxyflavone |
| 8                       | 20.15                | 298.0841 | C <sub>17</sub> H <sub>14</sub> O <sub>5</sub> | 5-Hydroxy-3,7-dimethoxyflavone          |
| 9                       | 20.77                | 328.0946 | C <sub>18</sub> H <sub>16</sub> O <sub>6</sub> | 5-Hydroxy-3,7,4'-trimethoxyflavone      |

**Table S6.** Chemical profile of flavonoids in *K. parviflora* *n*-hexane extract.

| <i>n</i> -Hexane extract |                      |          |                                                |                                         |
|--------------------------|----------------------|----------|------------------------------------------------|-----------------------------------------|
| Peak number              | Retention time (min) | Mass (g) | Chemical formula                               | Name of compounds                       |
| 4                        | 18.39                | 282.0892 | C <sub>17</sub> H <sub>14</sub> O <sub>4</sub> | 5,7-Dimethoxyflavone                    |
| 5                        | 19.46                | 342.1103 | C <sub>19</sub> H <sub>18</sub> O <sub>6</sub> | 3,5,7,4'-Tetramethoxyflavone            |
| 6                        | 19.88                | 358.1052 | C <sub>19</sub> H <sub>18</sub> O <sub>7</sub> | 5-Hydroxy-3,7,3',4'-tetramethoxyflavone |
| 7                        | 20.14                | 268.0735 | C <sub>16</sub> H <sub>12</sub> O <sub>4</sub> | 5-Hydroxy-7-methoxyflavone              |
| 8                        | 20.49                | 298.0841 | C <sub>17</sub> H <sub>14</sub> O <sub>5</sub> | 5-Hydroxy-3,7-dimethoxyflavone          |
| 9                        | 20.75                | 328.0946 | C <sub>18</sub> H <sub>16</sub> O <sub>6</sub> | 5-Hydroxy-3,7,4'-trimethoxyflavone      |

**Table S7.** Viscosity profiles of gel-cream formulations.

| Conditions | Viscosity (cP)   |                  |                  |                  |
|------------|------------------|------------------|------------------|------------------|
|            | Baseline         | Week 4           | Week 8           | Week 12          |
| CB (AT)    | 7783.33 ± 76.37  | 8123.33 ± 142.24 | 7936.66 ± 40.41  | 8070.00 ± 117.89 |
| CKP (AT)   | 7750.00 ± 105.83 | 8216.66 ± 98.14  | 7950.00 ± 70.02  | 8053.33 ± 96.09  |
| CB (4 °C)  | 7783.33 ± 76.37  | 8330.00 ± 150.99 | 8030.00 ± 130.00 | 8206.66 ± 30.55  |
| CKP (4 °C) | 7750.00 ± 105.83 | 8193.33 ± 246.64 | 8103.33 ± 82.86  | 8073.33 ± 70.23  |

|             |                  |                 |                  |                  |
|-------------|------------------|-----------------|------------------|------------------|
| CB (45°C)   | 7783.33 ± 76.37  | 8363.33 ± 89.62 | 7923.33 ± 180.37 | 8053.333 ± 59.86 |
| CKP (45 °C) | 7750.00 ± 105.83 | 8503.33 ± 32.14 | 8166.333 ± 58.59 | 8050.00 ± 130.86 |

cP: centipoise; AT: ambient temperature storing condition; 4 °C: refrigerator storing condition; 45 °C: hot oven storing condition.

**Table S8.** pH profiles of gel-cream formulations.

| Conditions  | pH          |             |             |             |
|-------------|-------------|-------------|-------------|-------------|
|             | Baseline    | Week 4      | Week 8      | Week 12     |
| CB (AT)     | 5.55 ± 0.00 | 5.40 ± 0.00 | 5.42 ± 0.02 | 5.43 ± 0.01 |
| CKP (AT)    | 5.55 ± 0.01 | 5.39 ± 0.01 | 5.40 ± 0.01 | 5.39 ± 0.01 |
| CB (4 °C)   | 5.55 ± 0.00 | 5.44 ± 0.01 | 5.48 ± 0.00 | 5.49 ± 0.01 |
| CKP (4 °C)  | 5.55 ± 0.01 | 5.42 ± 0.00 | 5.46 ± 0.02 | 5.47 ± 0.01 |
| CB (45 °C)  | 5.55 ± 0.00 | 5.40 ± 0.01 | 5.42 ± 0.01 | 5.48 ± 0.01 |
| CKP (45 °C) | 5.55 ± 0.01 | 5.39 ± 0.00 | 5.36 ± 0.00 | 5.39 ± 0.02 |

AT: ambient temperature storing condition; 4 °C: refrigerator storing condition; 45 °C: hot oven storing condition.

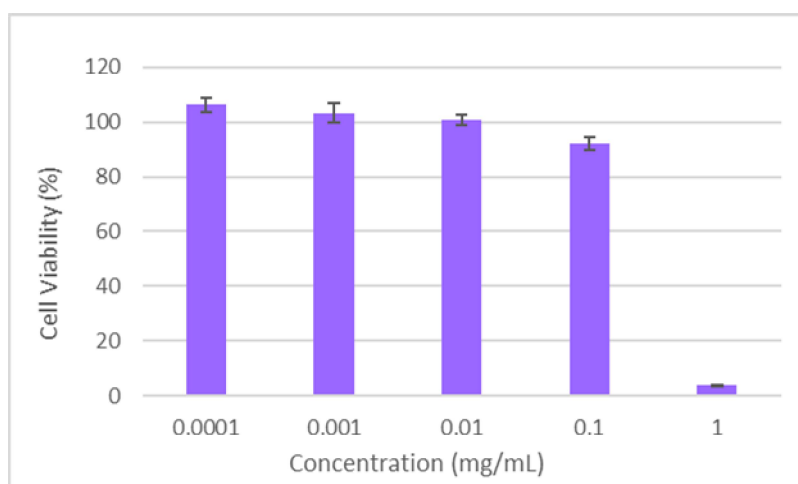

**Figure S1.** Human fibroblast cell viability with increasing concentrations of ethyl acetate extract of *K. parviflora*.

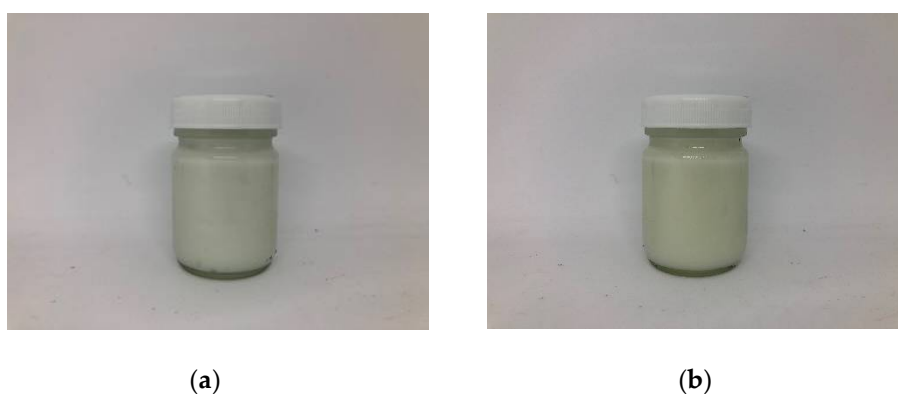

**Figure S2.** Gel-cream base (a) and gel-cream containing ethyl acetate extract of *K. parviflora* (b).
